# Supplementary material
Source: PubMed Central journal article supplement (PMC2697601)
Supplement: bi8019405_si_001.pdf [file bi8019405_si_001.pdf]

# A CA<sup>+</sup> Pair Adjacent to a Sheared GA or AA Pair Stabilizes Size-Symmetric RNA Internal Loops

(Supporting Information)

Gang Chen, Scott D. Kennedy, and Douglas H. Turner

**Table S1.** Measured thermodynamic parameters for several individual single strand homoduplexes or hairpins. Most values were done at pH 7 with those shown in bold at pH 5.5.

| Sequence                         | $-\Delta H^\circ$<br>(kcal/mol) | $-\Delta S^\circ$<br>(eu) | $-\Delta G^\circ_{37}$<br>(kcal/mol) | $T_m$<br>(°C) | $(C_T)$<br>(M)        |
|----------------------------------|---------------------------------|---------------------------|--------------------------------------|---------------|-----------------------|
| GGCGAAGGCU <sup>a</sup>          | 60.2                            | 170.0                     | 7.47                                 | 44.7          | $5.76 \times 10^{-5}$ |
|                                  | 66.5                            | 189.6                     | 7.68                                 | 42.2          | $2.25 \times 10^{-5}$ |
| GGUGGAGGCU <sup>a</sup>          | 42.5                            | 113.0                     | 7.43                                 | 52.4          | $1.51 \times 10^{-4}$ |
|                                  | 38.0                            | 98.0                      | 7.61                                 | 51.2          | $6.47 \times 10^{-5}$ |
| GAGCAAGCGAC <sup>a</sup>         | 56.2                            | 161.2                     | 6.22                                 | 38.6          | $6.61 \times 10^{-5}$ |
| GCUGAAGGCU                       | No apparent transition          |                           |                                      |               |                       |
| GCGAGACCCG                       | No apparent transition          |                           |                                      |               |                       |
| CGGAGGAUCGC                      | No apparent transition          |                           |                                      |               |                       |
| GGC <u>GAG</u> GCU <sup>b</sup>  | 46.2±3.9                        | 133.7±11.6                | 4.73±0.38                            | 72.4          |                       |
| GGU <u>AGAG</u> GCU <sup>b</sup> | 55.8±2.3                        | 164.2±6.6                 | 4.89±0.24                            | 66.8          |                       |
| GCCAAUGAGCCP <sup>b</sup>        | 23.4±2.5                        | 70.9±7.4                  | 1.45±0.22                            | 57.5          |                       |
|                                  | <b>25.0±1.8</b>                 | <b>75.9±5.5</b>           | <b>1.46±0.10</b>                     | <b>56.2</b>   |                       |
| GC <u>CGA</u> GCCP <sup>c</sup>  | (51.3±3.1)                      | (148.7±10.1)              | (5.18±0.08)                          | (34.0)        |                       |
| PCCGAGC CG                       | 47.1±7.3                        | 135.0±23.8                | 5.22±0.09                            | 34.0          |                       |
|                                  | <b>(51.0±3.8)</b>               | <b>(147.0±12.3)</b>       | <b>(5.45±0.08)</b>                   | <b>(35.7)</b> |                       |
|                                  | <b>48.5±5.5</b>                 | <b>138.7±17.5</b>         | <b>5.45±0.14</b>                     | <b>35.5</b>   |                       |

<sup>a</sup> Parameters of homoduplex formation were derived by fitting to a two-state melting transition model. <sup>b</sup> Hairpin formation is indicated by concentration independent  $T_m$ . The parameters were the average of two-state melt curve fits. <sup>c</sup> The homoduplex formation is indicated by concentration dependent  $T_m$ . The parameters were the average of six to nine two-state melt curve fits with those in parentheses derived by linear fit of  $T_M^{-1}$  vs  $\ln(C_T)$ .

**Table S2.** Multiple linear regression analysis of free energies of medium-size RNA internal loops measured here and previously (1-3). Inin for  $\Delta G^\circ_{\text{loop initiation}}(n)$ ; asym for  $\Delta G^\circ_{\text{asym}}$ ; 3ga for  $\Delta G^\circ_{3\text{GA bonus}}$ ; 2ga for  $\Delta G^\circ_{2\text{GA bonus}}$ ; ug/ga for  $\Delta G^\circ_{5'\text{UG}/3'\text{GA bonus}}$ ; AU for  $\Delta G^\circ_{\text{AU/GU penalty}}$ ; GA for  $\Delta G^\circ_{\text{GA bonus}}$ ; yAG for  $\Delta G^\circ_{5'\text{YA}/3'\text{RG bonus}}$ ; 2gc/ag for  $\Delta G^\circ_{2\times(5'\text{GA}/3'\text{CG}) \text{ bonus } (3 \times 3 \text{ loop})}$ ; UU for  $\Delta G^\circ_{\text{UU bonus}}$ ; mb for  $\Delta G^\circ_{\text{middle GA bonus } (3 \times 3 \text{ loop})}$ ; uw for  $\Delta G^\circ_{5'\text{GU}/3'\text{AN penalty } (3 \times 3 \text{ loop})}$ ; CA for  $\Delta G^\circ_{5'\text{CR}/3'\text{AA bonus}}$ . See Discussion section, Table 3, and refs (1, 2) for details of the free energy bonus and penalty terms. The highlighted values in the last column were used to derive the pH stabilization bonus,  $\Delta G^\circ_{5'\text{CR}/3'\text{AA, pH bonus}}$ .

| n1 | n2 | 5'-3' | 3'-5' | $\Delta G^\circ_{37, \text{loop}}$ | ini6 | ini7 | ini8 | ini9 | ini10 | asym | 3ga | 2ga | ug/ga | AU | GA | yAG | 2gc/ag | UU | mb | uw | CA | $\Delta G^\circ_{\text{predicted}}$ | $\Delta \Delta G^\circ_{37, \text{pH}}$ |
|----|----|-------|-------|------------------------------------|------|------|------|------|-------|------|-----|-----|-------|----|----|-----|--------|----|----|----|----|-------------------------------------|-----------------------------------------|
| 3  | 3  | gAAAc | cAAAg | 2.76                               | 1    | 0    | 0    | 0    | 0     | 0    | 0   | 0   | 0     | 0  | 0  | 0   | 0      | 0  | 0  | 0  | 0  | 2.15                                |                                         |
| 3  | 3  | cAAAg | gACcC | 2.65                               | 1    | 0    | 0    | 0    | 0     | 0    | 0   | 0   | 0     | 0  | 0  | 0   | 0      | 0  | 0  | 0  | 0  | 2.15                                | -0.82                                   |
| 3  | 3  | gAAAc | cAAAg | 2.47                               | 1    | 0    | 0    | 0    | 0     | 0    | 0   | 0   | 0     | 0  | 0  | 0   | 0      | 0  | 0  | 0  | 0  | 2.15                                |                                         |
| 3  | 3  | cAUAg | gAUGc | 2.46                               | 1    | 0    | 0    | 0    | 0     | 0    | 0   | 0   | 0     | 0  | 1  | 0   | 0      | 0  | 0  | 1  | 0  | 1.95                                |                                         |
| 3  | 3  | cAAAc | gAAAg | 2.41                               | 1    | 0    | 0    | 0    | 0     | 0    | 0   | 0   | 0     | 0  | 0  | 0   | 0      | 0  | 0  | 0  | 0  | 2.15                                |                                         |
| 3  | 3  | cAUAg | gAAAc | 2.37                               | 1    | 0    | 0    | 0    | 0     | 0    | 0   | 0   | 0     | 0  | 0  | 0   | 0      | 0  | 0  | 0  | 0  | 2.15                                |                                         |
| 3  | 3  | uGAAu | aAGAA | 2.30                               | 1    | 0    | 0    | 0    | 0     | 0    | 0   | 1   | 0     | 2  | 1  | 0   | 0      | 0  | 0  | 0  | 0  | 1.27                                |                                         |
| 3  | 3  | cAGAc | gAGAg | 2.29                               | 1    | 0    | 0    | 0    | 0     | 0    | 0   | 0   | 0     | 0  | 0  | 0   | 0      | 0  | 0  | 0  | 0  | 2.15                                |                                         |
| 3  | 3  | cAGAg | gAUGc | 2.25                               | 1    | 0    | 0    | 0    | 0     | 0    | 0   | 0   | 0     | 0  | 1  | 0   | 0      | 0  | 0  | 1  | 0  | 1.95                                |                                         |
| 3  | 3  | cGUAc | gAUAg | 2.15                               | 1    | 0    | 0    | 0    | 0     | 0    | 0   | 0   | 0     | 0  | 1  | 0   | 0      | 0  | 0  | 1  | 0  | 1.95                                |                                         |
| 3  | 3  | cAAAg | gAUGc | 1.98                               | 1    | 0    | 0    | 0    | 0     | 0    | 0   | 0   | 0     | 0  | 1  | 0   | 0      | 0  | 0  | 1  | 0  | 1.95                                |                                         |
| 3  | 3  | cAGAc | gAUAg | 1.94                               | 1    | 0    | 0    | 0    | 0     | 0    | 0   | 0   | 0     | 0  | 0  | 0   | 0      | 0  | 0  | 0  | 0  | 2.15                                |                                         |
| 3  | 3  | cCAAc | gAAAg | 1.94                               | 1    | 0    | 0    | 0    | 0     | 0    | 0   | 0   | 0     | 0  | 0  | 0   | 0      | 0  | 0  | 0  | 0  | 2.15                                |                                         |
| 3  | 3  | cAAAc | gAACg | 1.91                               | 1    | 0    | 0    | 0    | 0     | 0    | 0   | 0   | 0     | 0  | 0  | 0   | 0      | 0  | 0  | 0  | 0  | 2.15                                |                                         |
| 3  | 3  | cAGAc | gAUGg | 1.90                               | 1    | 0    | 0    | 0    | 0     | 0    | 0   | 0   | 0     | 0  | 1  | 0   | 0      | 0  | 0  | 1  | 0  | 1.95                                |                                         |
| 3  | 3  | gAAAc | cAAAg | 1.84                               | 1    | 0    | 0    | 0    | 0     | 0    | 0   | 0   | 0     | 0  | 0  | 0   | 0      | 0  | 0  | 0  | 0  | 2.15                                |                                         |
| 3  | 3  | gCACc | cCACg | 1.82                               | 1    | 0    | 0    | 0    | 0     | 0    | 0   | 0   | 0     | 0  | 0  | 0   | 0      | 0  | 0  | 0  | 0  | 2.15                                |                                         |
| 3  | 3  | cGGAc | gAUAg | 1.77                               | 1    | 0    | 0    | 0    | 0     | 0    | 0   | 0   | 0     | 0  | 1  | 0   | 0      | 0  | 0  | 0  | 0  | 1.21                                |                                         |
| 3  | 3  | cAAAg | gAAAc | 1.75                               | 1    | 0    | 0    | 0    | 0     | 0    | 0   | 0   | 0     | 0  | 0  | 0   | 0      | 0  | 0  | 0  | 0  | 2.15                                |                                         |

|   |   |       |       |      |   |   |   |   |   |   |   |   |   |   |   |   |   |   |   |   |      |       |
|---|---|-------|-------|------|---|---|---|---|---|---|---|---|---|---|---|---|---|---|---|---|------|-------|
| 3 | 3 | aGAAu | uAAGa | 1.66 | 1 | 0 | 0 | 0 | 0 | 0 | 0 | 0 | 0 | 2 | 2 | 0 | 0 | 0 | 0 | 0 | 1.49 |       |
| 3 | 3 | cUCUg | gUCUc | 1.64 | 1 | 0 | 0 | 0 | 0 | 0 | 0 | 0 | 0 | 0 | 0 | 0 | 2 | 0 | 0 | 0 | 0.93 |       |
| 3 | 3 | cAAAc | gAUGg | 1.57 | 1 | 0 | 0 | 0 | 0 | 0 | 0 | 0 | 0 | 1 | 0 | 0 | 0 | 0 | 1 | 0 | 1.95 |       |
| 3 | 3 | cAAAg | gAACc | 1.56 | 1 | 0 | 0 | 0 | 0 | 0 | 0 | 0 | 0 | 0 | 0 | 0 | 0 | 0 | 0 | 1 | 1.08 | -1.02 |
| 3 | 3 | cCGAc | gAGAg | 1.52 | 1 | 0 | 0 | 0 | 0 | 0 | 0 | 0 | 0 | 0 | 0 | 0 | 0 | 0 | 0 | 0 | 2.15 | -0.31 |
| 3 | 3 | cAAAc | gAGAg | 1.50 | 1 | 0 | 0 | 0 | 0 | 0 | 0 | 0 | 0 | 0 | 0 | 0 | 0 | 1 | 0 | 0 | 1.26 |       |
| 3 | 3 | cGCAg | gAAAc | 1.50 | 1 | 0 | 0 | 0 | 0 | 0 | 0 | 0 | 0 | 1 | 0 | 0 | 0 | 0 | 0 | 0 | 1.21 | 0.09  |
| 3 | 3 | gACAc | cACAg | 1.44 | 1 | 0 | 0 | 0 | 0 | 0 | 0 | 0 | 0 | 0 | 0 | 0 | 0 | 0 | 0 | 0 | 2.15 |       |
| 3 | 3 | cUGCc | gUAUg | 1.44 | 1 | 0 | 0 | 0 | 0 | 0 | 0 | 0 | 0 | 0 | 0 | 0 | 1 | 0 | 0 | 0 | 1.54 | 0.17  |
| 3 | 3 | cCGAc | gUAUg | 1.43 | 1 | 0 | 0 | 0 | 0 | 0 | 0 | 0 | 0 | 0 | 0 | 0 | 0 | 0 | 0 | 0 | 2.15 | -0.09 |
| 3 | 3 | cGAAc | gAAAg | 1.39 | 1 | 0 | 0 | 0 | 0 | 0 | 0 | 0 | 0 | 1 | 0 | 0 | 0 | 0 | 0 | 0 | 1.21 |       |
| 3 | 3 | uGAAa | aAAGu | 1.38 | 1 | 0 | 0 | 0 | 0 | 0 | 0 | 0 | 2 | 2 | 0 | 0 | 0 | 0 | 0 | 0 | 1.49 |       |
| 3 | 3 | cGAAc | gUAUg | 1.33 | 1 | 0 | 0 | 0 | 0 | 0 | 0 | 0 | 0 | 1 | 0 | 0 | 0 | 0 | 0 | 0 | 1.21 |       |
| 3 | 3 | cGAGc | gUAUg | 1.28 | 1 | 0 | 0 | 0 | 0 | 0 | 0 | 0 | 0 | 1 | 0 | 0 | 0 | 0 | 0 | 0 | 1.21 |       |
| 3 | 3 | cCGAc | gUAAg | 1.26 | 1 | 0 | 0 | 0 | 0 | 0 | 0 | 0 | 0 | 0 | 0 | 0 | 1 | 0 | 0 | 0 | 1.26 | 0.41  |
| 3 | 3 | cGAAg | gAAGc | 1.25 | 1 | 0 | 0 | 0 | 0 | 0 | 0 | 0 | 0 | 2 | 0 | 0 | 0 | 0 | 0 | 0 | 0.27 |       |
| 3 | 3 | gAAGc | cGUAg | 1.21 | 1 | 0 | 0 | 0 | 0 | 0 | 0 | 0 | 0 | 0 | 0 | 1 | 0 | 0 | 0 | 0 | 1.04 |       |
| 3 | 3 | cGAGc | gAAAg | 1.08 | 1 | 0 | 0 | 0 | 0 | 0 | 0 | 0 | 0 | 1 | 0 | 0 | 0 | 0 | 0 | 0 | 1.21 |       |
| 3 | 3 | cGAGc | gAAGg | 1.07 | 1 | 0 | 0 | 0 | 0 | 0 | 0 | 0 | 0 | 1 | 0 | 0 | 0 | 0 | 0 | 0 | 1.21 |       |
| 3 | 3 | cGAAg | gACCc | 1.00 | 1 | 0 | 0 | 0 | 0 | 0 | 0 | 0 | 0 | 1 | 0 | 0 | 0 | 0 | 0 | 0 | 1.21 | -0.69 |
| 3 | 3 | cUGUc | gUAUg | 0.99 | 1 | 0 | 0 | 0 | 0 | 0 | 0 | 0 | 0 | 0 | 0 | 0 | 2 | 0 | 0 | 0 | 0.93 |       |
| 3 | 3 | cAGAc | gAAAg | 0.91 | 1 | 0 | 0 | 0 | 0 | 0 | 0 | 0 | 0 | 0 | 0 | 0 | 0 | 1 | 0 | 0 | 1.26 |       |
| 3 | 3 | cGAAg | gAAAc | 0.89 | 1 | 0 | 0 | 0 | 0 | 0 | 0 | 0 | 0 | 1 | 0 | 0 | 0 | 0 | 0 | 0 | 1.21 |       |
| 3 | 3 | gAAGc | cGAAg | 0.87 | 1 | 0 | 0 | 0 | 0 | 0 | 0 | 0 | 0 | 0 | 0 | 1 | 0 | 0 | 0 | 0 | 1.04 |       |
| 3 | 3 | cUGAc | gUAAg | 0.79 | 1 | 0 | 0 | 0 | 0 | 0 | 0 | 0 | 0 | 0 | 0 | 1 | 1 | 0 | 0 | 0 | 0.65 |       |
| 3 | 3 | gUUUc | cUUUg | 0.79 | 1 | 0 | 0 | 0 | 0 | 0 | 0 | 0 | 0 | 0 | 0 | 0 | 2 | 0 | 0 | 0 | 0.93 |       |
| 3 | 3 | cUCUg | gUUUc | 0.78 | 1 | 0 | 0 | 0 | 0 | 0 | 0 | 0 | 0 | 0 | 0 | 0 | 2 | 0 | 0 | 0 | 0.93 |       |
| 3 | 3 | cGCAg | gAAGc | 0.73 | 1 | 0 | 0 | 0 | 0 | 0 | 0 | 0 | 0 | 2 | 0 | 0 | 0 | 0 | 0 | 0 | 0.27 | 0.06  |
| 3 | 3 | cUUUg | gUCUc | 0.72 | 1 | 0 | 0 | 0 | 0 | 0 | 0 | 0 | 0 | 0 | 0 | 0 | 2 | 0 | 0 | 0 | 0.93 |       |
| 3 | 3 | cAAGg | gGAAc | 0.71 | 1 | 0 | 0 | 0 | 0 | 0 | 0 | 0 | 0 | 0 | 2 | 0 | 0 | 0 | 0 | 0 | 0.71 |       |
| 3 | 3 | gGAAc | cAUGg | 0.70 | 1 | 0 | 0 | 0 | 0 | 0 | 0 | 0 | 0 | 2 | 0 | 0 | 0 | 0 | 0 | 0 | 0.27 |       |

|   |   |       |       |       |   |   |   |   |   |   |   |   |   |   |   |   |   |   |   |       |       |       |
|---|---|-------|-------|-------|---|---|---|---|---|---|---|---|---|---|---|---|---|---|---|-------|-------|-------|
| 3 | 3 | cUUUg | gUUUc | 0.69  | 1 | 0 | 0 | 0 | 0 | 0 | 0 | 0 | 0 | 0 | 0 | 0 | 2 | 0 | 0 | 0     | 0.93  |       |
| 3 | 3 | cGGAc | gAAAg | 0.69  | 1 | 0 | 0 | 0 | 0 | 0 | 0 | 0 | 0 | 0 | 0 | 0 | 0 | 1 | 0 | 1     | 0.19  | -1.14 |
| 3 | 3 | cUGCc | gUAAg | 0.63  | 1 | 0 | 0 | 0 | 0 | 0 | 0 | 0 | 0 | 0 | 0 | 1 | 1 | 0 | 0 | 0.65  | 0.13  |       |
| 3 | 3 | cAGAg | gAAAc | 0.58  | 1 | 0 | 0 | 0 | 0 | 0 | 0 | 0 | 0 | 0 | 0 | 0 | 1 | 0 | 0 | 1.26  |       |       |
| 3 | 3 | cGAAg | gAUGc | 0.57  | 1 | 0 | 0 | 0 | 0 | 0 | 0 | 0 | 0 | 2 | 0 | 0 | 0 | 0 | 0 | 0.27  |       |       |
| 3 | 3 | cGAGc | gAGAg | 0.54  | 1 | 0 | 0 | 0 | 0 | 0 | 1 | 0 | 0 | 1 | 0 | 0 | 0 | 0 | 0 | 0.05  |       |       |
| 3 | 3 | cAUAg | gAAGc | 0.51  | 1 | 0 | 0 | 0 | 0 | 0 | 0 | 0 | 1 | 0 | 0 | 0 | 0 | 0 | 0 | 1.21  |       |       |
| 3 | 3 | gGAAc | cAAGg | 0.49  | 1 | 0 | 0 | 0 | 0 | 0 | 0 | 0 | 0 | 2 | 0 | 0 | 0 | 0 | 0 | 0.27  |       |       |
| 3 | 3 | gGUAc | cAUGg | 0.29  | 1 | 0 | 0 | 0 | 0 | 0 | 0 | 0 | 0 | 2 | 0 | 0 | 0 | 0 | 0 | 0.27  |       |       |
| 3 | 3 | cAAAg | gAAGc | 0.26  | 1 | 0 | 0 | 0 | 0 | 0 | 0 | 0 | 0 | 1 | 0 | 0 | 0 | 0 | 0 | 1.21  |       |       |
| 3 | 3 | cGAAc | gAGAg | 0.16  | 1 | 0 | 0 | 0 | 0 | 0 | 1 | 0 | 0 | 1 | 0 | 0 | 0 | 0 | 0 | 0.05  |       |       |
| 3 | 3 | cGAAg | gAAGc | 0.15  | 1 | 0 | 0 | 0 | 0 | 0 | 0 | 0 | 0 | 2 | 0 | 0 | 0 | 0 | 0 | 0.27  |       |       |
| 3 | 3 | cCGAg | gAAAc | 0.05  | 1 | 0 | 0 | 0 | 0 | 0 | 0 | 0 | 0 | 0 | 0 | 0 | 1 | 0 | 1 | 0.19  | -0.63 |       |
| 3 | 3 | cGAAc | gAAGg | -0.07 | 1 | 0 | 0 | 0 | 0 | 0 | 0 | 0 | 0 | 2 | 0 | 0 | 0 | 0 | 0 | 0.27  |       |       |
| 3 | 3 | cGAAg | gAACc | -0.13 | 1 | 0 | 0 | 0 | 0 | 0 | 0 | 0 | 1 | 0 | 0 | 0 | 0 | 0 | 1 | 0.14  | -0.84 |       |
| 3 | 3 | cAGAc | gAAGg | -0.24 | 1 | 0 | 0 | 0 | 0 | 0 | 1 | 0 | 0 | 1 | 0 | 0 | 0 | 0 | 0 | 0.05  |       |       |
| 3 | 3 | cGGAc | gAAGg | -0.36 | 1 | 0 | 0 | 0 | 0 | 0 | 1 | 0 | 0 | 1 | 0 | 0 | 0 | 0 | 1 | -1.02 | -0.97 |       |
| 3 | 3 | cAGAg | gAAGc | -0.45 | 1 | 0 | 0 | 0 | 0 | 0 | 1 | 0 | 0 | 1 | 0 | 0 | 0 | 0 | 0 | 0.05  |       |       |
| 3 | 3 | cCGAg | gAAGc | -0.60 | 1 | 0 | 0 | 0 | 0 | 0 | 1 | 0 | 0 | 1 | 0 | 0 | 0 | 0 | 1 | -1.02 | -1.12 |       |
| 3 | 3 | cGGAc | gAAAg | -0.65 | 1 | 0 | 0 | 0 | 0 | 0 | 1 | 0 | 0 | 1 | 0 | 0 | 0 | 0 | 0 | 0.05  |       |       |
| 3 | 3 | cGAAg | gAGGg | -1.73 | 1 | 0 | 0 | 0 | 0 | 0 | 1 | 0 | 0 | 0 | 2 | 0 | 0 | 0 | 0 | -2.09 |       |       |
| 3 | 3 | cGGAc | gAAGg | -1.80 | 1 | 0 | 0 | 0 | 0 | 0 | 1 | 0 | 0 | 0 | 2 | 0 | 0 | 0 | 0 | -2.09 |       |       |
| 3 | 3 | uAAAu | gAAAg | 4.73  | 1 | 0 | 0 | 0 | 0 | 0 | 0 | 0 | 2 | 0 | 0 | 0 | 0 | 0 | 0 | 3.37  |       |       |
| 3 | 3 | uAAAu | gAAGg | 3.59  | 1 | 0 | 0 | 0 | 0 | 0 | 0 | 0 | 2 | 1 | 0 | 0 | 0 | 0 | 0 | 2.43  |       |       |
| 3 | 3 | uGAAu | gAAAg | 3.41  | 1 | 0 | 0 | 0 | 0 | 0 | 0 | 1 | 2 | 1 | 0 | 0 | 0 | 0 | 0 | 1.58  |       |       |
| 3 | 3 | uAAAg | gAAAu | 2.79  | 1 | 0 | 0 | 0 | 0 | 0 | 0 | 0 | 2 | 0 | 0 | 0 | 0 | 0 | 0 | 3.37  |       |       |
| 3 | 3 | uGAAu | gAAGg | 0.62  | 1 | 0 | 0 | 0 | 0 | 0 | 0 | 1 | 2 | 2 | 0 | 0 | 0 | 0 | 0 | 0.64  |       |       |
| 3 | 3 | cCAAg | gACGu | 0.10  | 1 | 0 | 0 | 0 | 0 | 0 | 0 | 1 | 1 | 1 | 0 | 0 | 0 | 0 | 0 | 0.97  |       |       |
| 3 | 3 | cGAAg | gAGGu | -3.42 | 1 | 0 | 0 | 0 | 0 | 0 | 1 | 0 | 1 | 1 | 2 | 0 | 0 | 0 | 0 | -2.33 |       |       |
| 3 | 3 | uGGAg | gAAGc | -2.62 | 1 | 0 | 0 | 0 | 0 | 0 | 1 | 0 | 1 | 1 | 2 | 0 | 0 | 0 | 0 | -2.33 |       |       |
| 3 | 3 | uGGAg | gAAGu | -2.53 | 1 | 0 | 0 | 0 | 0 | 0 | 1 | 0 | 2 | 2 | 2 | 0 | 0 | 0 | 0 | -2.57 |       |       |

|   |   |        |        |       |   |   |   |   |   |   |   |   |   |   |   |   |   |   |   |   |       |
|---|---|--------|--------|-------|---|---|---|---|---|---|---|---|---|---|---|---|---|---|---|---|-------|
| 3 | 3 | uGGAg  | aAAGc  | -2.27 | 1 | 0 | 0 | 0 | 0 | 0 | 1 | 0 | 0 | 1 | 2 | 0 | 0 | 0 | 0 | 0 | -1.48 |
| 3 | 3 | cGGAg  | gAAGc  | -2.20 | 1 | 0 | 0 | 0 | 0 | 0 | 1 | 0 | 0 | 0 | 2 | 0 | 0 | 0 | 0 | 0 | -2.09 |
| 3 | 3 | cGGAg  | gAAGu  | -2.00 | 1 | 0 | 0 | 0 | 0 | 0 | 1 | 0 | 1 | 1 | 2 | 0 | 0 | 0 | 0 | 0 | -2.33 |
| 3 | 3 | uGUAg  | gAAGc  | -0.77 | 1 | 0 | 0 | 0 | 0 | 0 | 0 | 0 | 1 | 1 | 2 | 0 | 0 | 0 | 0 | 0 | 0.03  |
| 3 | 3 | uGAAg  | aAAGc  | -0.51 | 1 | 0 | 0 | 0 | 0 | 0 | 0 | 0 | 0 | 1 | 2 | 0 | 0 | 0 | 0 | 0 | 0.88  |
| 3 | 3 | uGAAg  | gAAGC  | -0.48 | 1 | 0 | 0 | 0 | 0 | 0 | 0 | 0 | 1 | 1 | 2 | 0 | 0 | 0 | 0 | 0 | 0.03  |
| 3 | 3 | uGAAg  | gAUGc  | -0.43 | 1 | 0 | 0 | 0 | 0 | 0 | 0 | 0 | 1 | 1 | 2 | 0 | 0 | 0 | 0 | 0 | 0.03  |
| 3 | 3 | cGAAg  | gAAGc  | -0.37 | 1 | 0 | 0 | 0 | 0 | 0 | 0 | 0 | 0 | 0 | 2 | 0 | 0 | 0 | 0 | 0 | 0.27  |
| 3 | 3 | uAGAg  | gAAGc  | -0.26 | 1 | 0 | 0 | 0 | 0 | 0 | 0 | 1 | 0 | 1 | 1 | 0 | 0 | 0 | 0 | 0 | 0.66  |
| 3 | 3 | uGAAg  | gAAGu  | -0.16 | 1 | 0 | 0 | 0 | 0 | 0 | 0 | 0 | 2 | 2 | 2 | 0 | 0 | 0 | 0 | 0 | -0.21 |
| 3 | 3 | cGAAg  | gAUGc  | -0.11 | 1 | 0 | 0 | 0 | 0 | 0 | 0 | 0 | 0 | 0 | 2 | 0 | 0 | 0 | 0 | 0 | 0.27  |
| 3 | 3 | cGAAg  | gAAGu  | 0.43  | 1 | 0 | 0 | 0 | 0 | 0 | 0 | 0 | 1 | 1 | 2 | 0 | 0 | 0 | 0 | 0 | 0.03  |
| 2 | 4 | uGAg   | gAAGGc | 1.28  | 1 | 0 | 0 | 0 | 0 | 2 | 0 | 0 | 1 | 1 | 2 | 0 | 0 | 0 | 0 | 0 | 0.95  |
| 2 | 4 | uGGAAg | gAGc   | 1.32  | 1 | 0 | 0 | 0 | 0 | 2 | 0 | 0 | 1 | 1 | 2 | 0 | 0 | 0 | 0 | 0 | 0.95  |
| 2 | 4 | cGAAAg | gAGc   | 1.73  | 1 | 0 | 0 | 0 | 0 | 2 | 0 | 0 | 0 | 0 | 2 | 0 | 0 | 0 | 0 | 0 | 1.19  |
| 2 | 4 | cAAc   | gAAAAg | 3.01  | 1 | 0 | 0 | 0 | 0 | 2 | 0 | 0 | 0 | 0 | 0 | 0 | 0 | 0 | 0 | 0 | 3.07  |
| 2 | 4 | gAAg   | cAAAAc | 3.08  | 1 | 0 | 0 | 0 | 0 | 2 | 0 | 0 | 0 | 0 | 0 | 0 | 0 | 0 | 0 | 0 | 3.07  |
| 3 | 4 | uGGAAg | gAAGc  | -1.18 | 0 | 1 | 0 | 0 | 0 | 1 | 1 | 0 | 1 | 1 | 1 | 0 | 0 | 0 | 0 | 0 | -0.86 |
| 3 | 4 | cGGAg  | gAAGGc | -1.00 | 0 | 1 | 0 | 0 | 0 | 1 | 1 | 0 | 0 | 0 | 1 | 0 | 0 | 0 | 0 | 0 | -0.62 |
| 3 | 4 | uGGAg  | gAAGGc | -0.92 | 0 | 1 | 0 | 0 | 0 | 1 | 1 | 0 | 1 | 1 | 1 | 0 | 0 | 0 | 0 | 0 | -0.86 |
| 3 | 4 | cGAAg  | gAAGGc | -0.67 | 0 | 1 | 0 | 0 | 0 | 1 | 1 | 0 | 0 | 0 | 1 | 0 | 0 | 0 | 0 | 0 | -0.62 |
| 3 | 4 | uGAAg  | gAAGGc | -0.52 | 0 | 1 | 0 | 0 | 0 | 1 | 1 | 0 | 0 | 1 | 1 | 0 | 0 | 0 | 0 | 0 | -0.01 |
| 3 | 4 | cAAAg  | gAAGGc | 0.59  | 0 | 1 | 0 | 0 | 0 | 1 | 0 | 1 | 0 | 0 | 1 | 0 | 0 | 0 | 0 | 0 | 0.58  |
| 3 | 4 | cGGAc  | gAAGAg | 0.07  | 0 | 1 | 0 | 0 | 0 | 1 | 1 | 0 | 0 | 0 | 1 | 0 | 0 | 0 | 0 | 0 | -0.62 |
| 3 | 4 | cAGAc  | gAAAGg | 0.88  | 0 | 1 | 0 | 0 | 0 | 1 | 0 | 1 | 0 | 0 | 1 | 0 | 0 | 0 | 0 | 0 | 0.58  |
| 3 | 4 | cGAAAg | gAAGc  | 1.10  | 0 | 1 | 0 | 0 | 0 | 1 | 0 | 0 | 0 | 0 | 2 | 0 | 0 | 0 | 0 | 0 | 0.80  |
| 3 | 4 | cAAGAc | gAAGg  | 1.24  | 0 | 1 | 0 | 0 | 0 | 1 | 0 | 1 | 0 | 0 | 1 | 0 | 0 | 0 | 0 | 0 | 0.58  |
| 3 | 4 | cAGGAc | gAAGg  | 1.26  | 0 | 1 | 0 | 0 | 0 | 1 | 0 | 1 | 0 | 0 | 1 | 0 | 0 | 0 | 0 | 0 | 0.58  |
| 3 | 4 | uAGAg  | gAAGGc | 1.63  | 0 | 1 | 0 | 0 | 0 | 1 | 0 | 0 | 0 | 1 | 1 | 0 | 0 | 0 | 0 | 0 | 2.35  |
| 3 | 4 | cAGGAc | gAUGg  | 1.72  | 0 | 1 | 0 | 0 | 0 | 1 | 0 | 0 | 0 | 0 | 1 | 0 | 0 | 0 | 0 | 0 | 1.74  |
| 3 | 4 | cAGAGc | gAGAg  | 2.74  | 0 | 1 | 0 | 0 | 0 | 1 | 0 | 0 | 0 | 0 | 0 | 0 | 0 | 0 | 0 | 0 | 2.68  |

|   |   |        |          |       |   |   |   |   |   |   |   |   |   |   |   |   |   |   |   |   |       |  |
|---|---|--------|----------|-------|---|---|---|---|---|---|---|---|---|---|---|---|---|---|---|---|-------|--|
| 2 | 5 | uGAg   | gAAGGAc  | 2.50  | 0 | 1 | 0 | 0 | 0 | 3 | 0 | 0 | 1 | 1 | 1 | 0 | 0 | 0 | 0 | 0 | 2.42  |  |
| 2 | 5 | cGAg   | gAGUAAc  | 3.00  | 0 | 1 | 0 | 0 | 0 | 3 | 0 | 0 | 0 | 0 | 1 | 0 | 0 | 0 | 0 | 0 | 2.66  |  |
| 4 | 4 | uGGAAg | gAAGGc   | -4.27 | 0 | 0 | 1 | 0 | 0 | 0 | 1 | 1 | 1 | 1 | 2 | 0 | 0 | 0 | 0 | 0 | -3.50 |  |
| 4 | 4 | cGAAAg | gAAGGc   | -0.90 | 0 | 0 | 1 | 0 | 0 | 0 | 0 | 1 | 0 | 0 | 2 | 0 | 0 | 0 | 0 | 0 | -0.90 |  |
| 4 | 4 | cAGGAc | gAAAGg   | 0.03  | 0 | 0 | 1 | 0 | 0 | 0 | 0 | 1 | 0 | 0 | 1 | 0 | 0 | 0 | 0 | 0 | 0.04  |  |
| 4 | 4 | cAAGAc | gAAAGg   | 0.85  | 0 | 0 | 1 | 0 | 0 | 0 | 0 | 1 | 0 | 0 | 1 | 0 | 0 | 0 | 0 | 0 | 0.04  |  |
| 4 | 4 | cGAAAg | gAAAGc   | 0.96  | 0 | 0 | 1 | 0 | 0 | 0 | 0 | 0 | 0 | 0 | 2 | 0 | 0 | 0 | 0 | 0 | 0.26  |  |
| 4 | 4 | cAGAGc | gAAGAg   | 2.07  | 0 | 0 | 1 | 0 | 0 | 0 | 0 | 0 | 0 | 0 | 0 | 0 | 0 | 0 | 0 | 0 | 2.14  |  |
| 4 | 4 | cAAAAg | gAAAAc   | 2.23  | 0 | 0 | 1 | 0 | 0 | 0 | 0 | 0 | 0 | 0 | 0 | 0 | 0 | 0 | 0 | 0 | 2.14  |  |
| 4 | 4 | cAAAGc | gAAGAg   | 2.88  | 0 | 0 | 1 | 0 | 0 | 0 | 0 | 0 | 0 | 0 | 0 | 0 | 0 | 0 | 0 | 0 | 2.14  |  |
| 4 | 4 | gAAAAc | cAAAAg   | 3.01  | 0 | 0 | 1 | 0 | 0 | 0 | 0 | 0 | 0 | 0 | 0 | 0 | 0 | 0 | 0 | 0 | 2.14  |  |
| 3 | 5 | cGGAg  | gAAGGAc  | 0.80  | 0 | 0 | 1 | 0 | 0 | 2 | 1 | 0 | 0 | 0 | 1 | 0 | 0 | 0 | 0 | 0 | -0.24 |  |
| 3 | 5 | uGGAg  | gAAGGAc  | 1.07  | 0 | 0 | 1 | 0 | 0 | 2 | 1 | 0 | 1 | 1 | 1 | 0 | 0 | 0 | 0 | 0 | -0.48 |  |
| 3 | 5 | cGAAg  | gAAGGAc  | 1.76  | 0 | 0 | 1 | 0 | 0 | 2 | 0 | 0 | 0 | 0 | 1 | 0 | 0 | 0 | 0 | 0 | 2.12  |  |
| 3 | 5 | uGAAg  | gAAGGAc  | 1.78  | 0 | 0 | 1 | 0 | 0 | 2 | 0 | 0 | 1 | 1 | 1 | 0 | 0 | 0 | 0 | 0 | 1.88  |  |
| 3 | 5 | cAAAg  | gAAGGAc  | 2.45  | 0 | 0 | 1 | 0 | 0 | 2 | 0 | 0 | 0 | 0 | 0 | 0 | 0 | 0 | 0 | 0 | 3.06  |  |
| 3 | 5 | uAGAg  | gAAGGAc  | 2.68  | 0 | 0 | 1 | 0 | 0 | 2 | 0 | 0 | 0 | 1 | 0 | 0 | 0 | 0 | 0 | 0 | 3.67  |  |
| 2 | 6 | cGAg   | gAAAAAc  | 2.43  | 0 | 0 | 1 | 0 | 0 | 4 | 0 | 0 | 0 | 0 | 1 | 0 | 0 | 0 | 0 | 0 | 3.04  |  |
| 4 | 5 | uGGAAg | gAAGGAc  | -0.29 | 0 | 0 | 0 | 1 | 0 | 1 | 1 | 0 | 1 | 1 | 1 | 0 | 0 | 0 | 0 | 0 | -0.73 |  |
| 4 | 5 | cGAAAg | gAAGGAc  | 1.66  | 0 | 0 | 0 | 1 | 0 | 1 | 0 | 0 | 0 | 0 | 1 | 0 | 0 | 0 | 0 | 0 | 1.87  |  |
| 3 | 6 | uGGAg  | gAAGUUUc | -0.33 | 0 | 0 | 0 | 1 | 0 | 3 | 1 | 0 | 1 | 1 | 1 | 0 | 0 | 0 | 0 | 0 | 0.19  |  |
| 3 | 6 | cGGAg  | gAAGUUUc | -0.22 | 0 | 0 | 0 | 1 | 0 | 3 | 1 | 0 | 0 | 0 | 1 | 0 | 0 | 0 | 0 | 0 | 0.43  |  |
| 3 | 6 | uGGAg  | gAAGAAAc | 0.17  | 0 | 0 | 0 | 1 | 0 | 3 | 1 | 0 | 1 | 1 | 1 | 0 | 0 | 0 | 0 | 0 | 0.19  |  |
| 3 | 6 | cGGAg  | gAAGAAAc | 1.46  | 0 | 0 | 0 | 1 | 0 | 3 | 1 | 0 | 0 | 0 | 1 | 0 | 0 | 0 | 0 | 0 | 0.43  |  |
| 3 | 6 | cGAAg  | gAAGAAAc | 2.49  | 0 | 0 | 0 | 1 | 0 | 3 | 0 | 0 | 0 | 0 | 1 | 0 | 0 | 0 | 0 | 0 | 2.79  |  |
| 3 | 6 | cGGAg  | gAAAAAc  | 2.79  | 0 | 0 | 0 | 1 | 0 | 3 | 0 | 0 | 0 | 0 | 1 | 0 | 0 | 0 | 0 | 0 | 2.79  |  |
| 3 | 6 | cGAAg  | gAAAAAc  | 2.84  | 0 | 0 | 0 | 1 | 0 | 3 | 0 | 0 | 0 | 0 | 1 | 0 | 0 | 0 | 0 | 0 | 2.79  |  |
| 3 | 6 | cGGAg  | cGAAAAc  | 2.99  | 0 | 0 | 0 | 1 | 0 | 3 | 0 | 0 | 0 | 0 | 1 | 0 | 0 | 0 | 0 | 0 | 2.79  |  |
| 3 | 6 | cAAAg  | gAAAAAc  | 3.08  | 0 | 0 | 0 | 1 | 0 | 3 | 0 | 0 | 0 | 0 | 0 | 0 | 0 | 0 | 0 | 0 | 3.73  |  |
| 3 | 6 | uGUAg  | gAAAAAc  | 3.25  | 0 | 0 | 0 | 1 | 0 | 3 | 0 | 0 | 1 | 1 | 1 | 0 | 0 | 0 | 0 | 0 | 2.55  |  |
| 4 | 6 | uGGAAg | gAAGAAAc | 0.76  | 0 | 0 | 0 | 0 | 1 | 2 | 1 | 0 | 1 | 1 | 1 | 0 | 0 | 0 | 0 | 0 | 0.33  |  |

|   |   |         |         |       |     |    |    |    |   |    |    |    |    |    |     |   |   |    |    |   |    |       |       |
|---|---|---------|---------|-------|-----|----|----|----|---|----|----|----|----|----|-----|---|---|----|----|---|----|-------|-------|
| 4 | 6 | uGGAAg  | gAAAAAc | 2.18  | 0   | 0  | 0  | 0  | 1 | 2  | 0  | 0  | 1  | 1  | 1   | 0 | 0 | 0  | 0  | 0 | 0  | 2.69  |       |
| 4 | 6 | cGAAAg  | gAAAAAc | 2.83  | 0   | 0  | 0  | 0  | 1 | 2  | 0  | 0  | 0  | 0  | 1   | 0 | 0 | 0  | 0  | 0 | 0  | 2.93  |       |
| 4 | 6 | cGAAAg  | gAGAAAc | 3.06  | 0   | 0  | 0  | 0  | 1 | 2  | 0  | 0  | 0  | 0  | 1   | 0 | 0 | 0  | 0  | 0 | 0  | 2.93  |       |
| 4 | 4 | gCGAAg  | cAAGc   | -0.07 | 0   | 0  | 1  | 0  | 0 | 0  | 0  | 0  | 0  | 1  | 0   | 0 | 0 | 0  | 0  | 0 | 1  | 0.13  | -1.73 |
| 4 | 4 | gCGGAg  | cAAGc   | -2.00 | 0   | 0  | 1  | 0  | 0 | 0  | 1  | 0  | 0  | 0  | 1   | 0 | 0 | 0  | 0  | 0 | 1  | -2.23 | -1.72 |
| 4 | 4 | cCGAAg  | gAAGCc  | -1.76 | 0   | 0  | 1  | 0  | 0 | 0  | 0  | 1  | 0  | 0  | 0   | 0 | 0 | 0  | 0  | 0 | 2  | -1.16 | -2.38 |
| 3 | 3 | gAAAc   | cAACg   | 2.03  | 1   | 0  | 0  | 0  | 0 | 0  | 0  | 0  | 0  | 0  | 0   | 0 | 0 | 0  | 0  | 0 | 1  | 1.08  | -1.19 |
| 4 | 4 | cCGAAg  | gAAGCc  | -1.16 | 0   | 0  | 1  | 0  | 0 | 0  | 0  | 1  | 0  | 0  | 0   | 0 | 0 | 0  | 0  | 0 | 2  | -1.16 | -2.14 |
| 3 | 4 | gCGAg   | cAAGc   | -0.99 | 0   | 1  | 0  | 0  | 0 | 1  | 0  | 1  | 0  | 0  | 1   | 0 | 0 | 0  | 0  | 0 | 1  | -0.49 | -0.89 |
| 3 | 3 | uGAAg   | gAACc   | -0.04 | 1   | 0  | 0  | 0  | 0 | 0  | 0  | 0  | 1  | 1  | 1   | 0 | 0 | 0  | 0  | 0 | 1  | -0.10 | -0.80 |
| 5 | 5 | gCGAACg | cAAGAAc | 0.79  | 0   | 0  | 0  | 0  | 1 | 0  | 0  | 1  | 0  | 0  | 0   | 0 | 0 | 0  | 0  | 0 | 1  | 0.72  | -1.56 |
| 4 | 4 | aAGAAg  | uCAGCc  | -0.09 | 0   | 0  | 1  | 0  | 0 | 0  | 0  | 1  | 0  | 1  | 0   | 0 | 0 | 0  | 0  | 0 | 1  | 0.52  | -0.73 |
| 2 | 4 | cCGAGc  | gAGg    | 2.60  | 1   | 0  | 0  | 0  | 0 | 2  | 0  | 0  | 0  | 0  | 0   | 0 | 0 | 0  | 0  | 0 | 0  | 3.07  | -0.73 |
| 3 | 3 | cAUAg   | gAACc   | 2.40  | 1   | 0  | 0  | 0  | 0 | 0  | 0  | 0  | 0  | 0  | 0   | 0 | 0 | 0  | 0  | 0 | 0  | 2.15  | -0.64 |
| 3 | 3 | uCAAg   | aAAGc   | 0.84  | 1   | 0  | 0  | 0  | 0 | 0  | 0  | 0  | 0  | 1  | 1   | 0 | 0 | 0  | 0  | 0 | 1  | 0.75  | -0.64 |
| 4 | 4 | aAGAAg  | uCUGCc  | 2.13  | 0   | 0  | 1  | 0  | 0 | 0  | 0  | 0  | 0  | 1  | 0   | 0 | 0 | 0  | 0  | 1 | 1  | 2.42  | -0.73 |
| 3 | 3 | uGUAg   | gAACc   | 1.41  | 1   | 0  | 0  | 0  | 0 | 0  | 0  | 0  | 1  | 1  | 1   | 0 | 0 | 0  | 0  | 1 | 0  | 1.71  | -0.30 |
| 3 | 3 | uGGAg   | gAACc   | -0.09 | 1   | 0  | 0  | 0  | 0 | 0  | 0  | 1  | 1  | 1  | 1   | 0 | 0 | 0  | 0  | 0 | 0  | -0.19 | -0.29 |
| 3 | 3 | uAGAg   | gAACc   | 1.66  | 1   | 0  | 0  | 0  | 0 | 0  | 0  | 0  | 0  | 1  | 0   | 0 | 0 | 0  | 1  | 0 | 0  | 1.87  | -0.25 |
| 3 | 3 | uCAAg   | gAAGc   | 0.47  | 1   | 0  | 0  | 0  | 0 | 0  | 0  | 0  | 0  | 1  | 1   | 0 | 0 | 0  | 0  | 0 | 1  | 0.75  | -0.19 |
| 3 | 3 | cAGAg   | gAACc   | 1.77  | 1   | 0  | 0  | 0  | 0 | 0  | 0  | 0  | 0  | 0  | 0   | 0 | 0 | 1  | 0  | 0 | 0  | 1.26  | -0.04 |
| 3 | 4 | aGACc   | uAGGAg  | 0.69  | 0   | 1  | 0  | 0  | 0 | 1  | 0  | 1  | 0  | 1  | 1   | 0 | 0 | 0  | 0  | 0 | 0  | 1.19  | 0.00  |
| 3 | 3 | cAAAc   | gCAAg   | 2.27  | 1   | 0  | 0  | 0  | 0 | 0  | 0  | 0  | 0  | 0  | 0   | 0 | 0 | 0  | 0  | 0 | 0  | 2.15  | 0.01  |
| 3 | 3 | cAAGc   | gCAAg   | 2.48  | 1   | 0  | 0  | 0  | 0 | 0  | 0  | 0  | 0  | 0  | 0   | 0 | 0 | 0  | 0  | 0 | 0  | 2.15  | 0.08  |
| 4 | 4 | aAGAAg  | uCAGGc  | -1.25 | 0   | 0  | 1  | 0  | 0 | 0  | 1  | 0  | 0  | 1  | 1   | 0 | 0 | 0  | 0  | 0 | 0  | -0.55 | 0.19  |
|   |   |         |         |       |     |    |    |    |   |    |    |    |    |    |     |   |   |    |    |   |    |       |       |
|   |   |         |         | #     | 110 | 18 | 23 | 12 | 5 | 90 | 25 | 24 | 31 | 58 | 144 | 2 | 2 | 15 | 10 | 8 | 20 |       |       |

**Figure S1.** Base stacking and base pairing involving CA. Base pairs shown in thicker lines are closer to viewer. Hydrogen atoms are shown in NMR structures but not in crystal structures. **(a)** The Watson-Crick CG, wobble CA<sup>+</sup> (the proton from protonation is not shown), and sheared GA pairs in  $\begin{smallmatrix} \text{C} & \text{CG} \\ \text{G} & \text{AA} \end{smallmatrix}$  segment of the NMR structure of substrate loop of VS ribozyme (4). **(b)** The Watson-Crick CG, A N1-C amino pair AC, and sheared GA pairs in  $\begin{smallmatrix} \text{C} & \text{AG} \\ \text{G} & \text{CA} \end{smallmatrix}$  segment of the NMR structure of loop B of a hairpin ribozyme (5, 6). **(c)** The Watson-Crick GC, wobble CA<sup>+</sup> (the proton from protonation is not shown), and sheared AA pairs in the J4/5 loop of a crystal structure of group I intron (7). **(d)** The wobble CA<sup>+</sup> (the proton from protonation is not shown) flanked by two Watson-Crick AU pairs from a crystal structure (8). **(e)** The Watson-Crick CG and wobble CA<sup>+</sup> (the proton from protonation is not shown) pairs in a crystal structure (9). The stacking figures are generated by the 3DNA program (10).

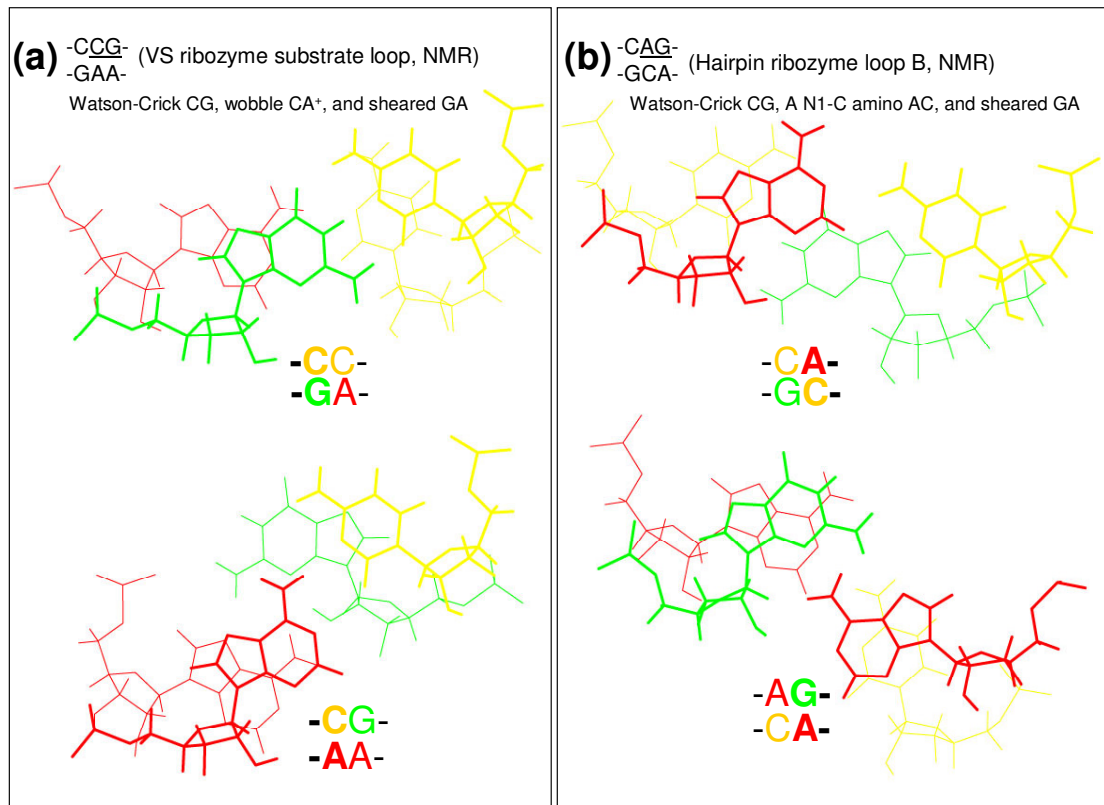



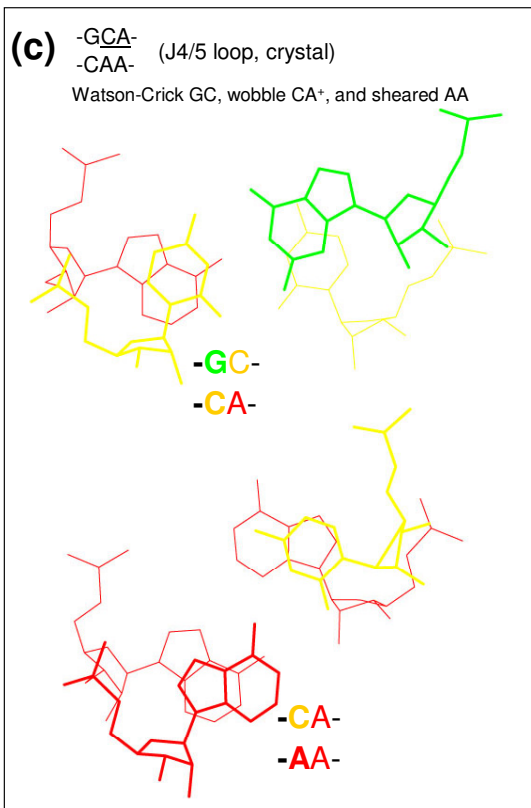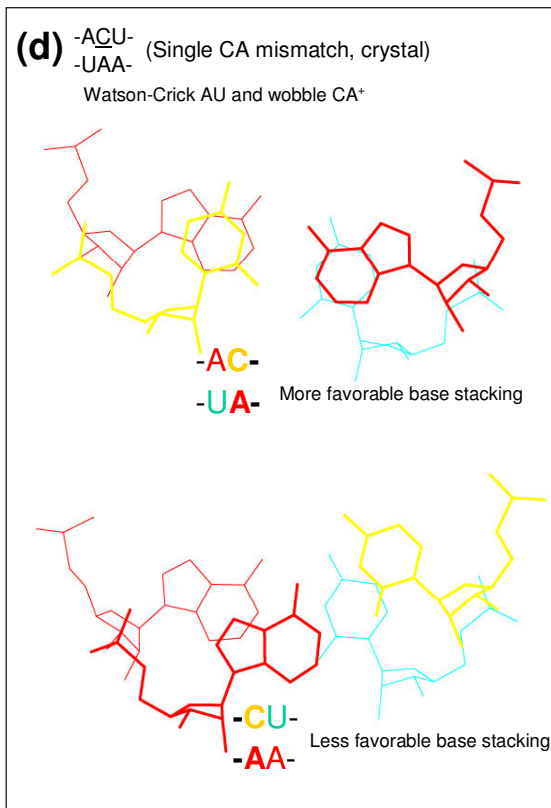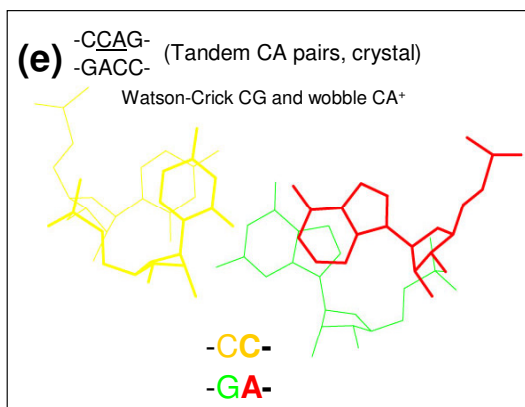

**Figure S2.** Two-dimensional exchangeable proton SNOESY spectrum of  $\begin{array}{c} \text{GC CGAA GCG} \\ \text{GCG AAGC CG} \end{array}$  (200 ms mixing time, in 80 mM NaCl, 10 mM sodium phosphate, 0.5 mM sodium EDTA, pH 5.9 at 0 °C). The NOE cross-peak of G1H1-G7H1 is observed. Values beside the sequence are  $\Delta G^{\circ}_{37, \text{loop}}$  in kcal/mol measured in 1 M NaCl, at pH 5.5 (bottom) and pH 7 (top). The 1D spectrum is shown in Figure 2e.

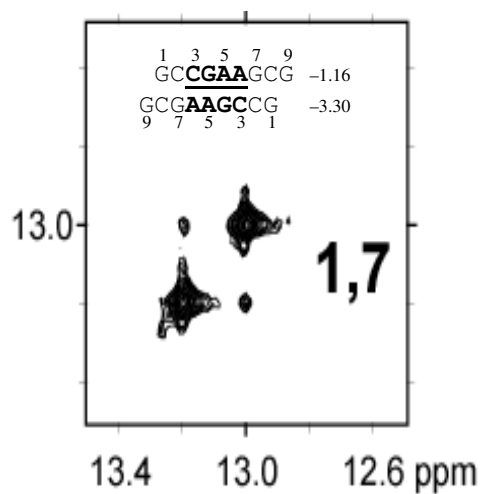

## REFERENCES

- (1) Chen, G., and Turner, D.H. (2006) Consecutive GA Pairs Stabilize Medium-Size RNA Internal Loops. *Biochemistry* 45, 4025-43.
- (2) Chen, G., Znosko, B.M., Jiao, X.Q., and Turner, D.H. (2004) Factors affecting thermodynamic stabilities of RNA 3 × 3 internal loops. *Biochemistry* 43, 12865-76.
- (3) Chen, G., Znosko, B.M., Kennedy, S.D., Krugh, T.R., and Turner, D.H. (2005) Solution structure of an RNA internal loop with three consecutive sheared GA pairs. *Biochemistry* 44, 2845-56.
- (4) Michiels, P.J.A., Schouten, C.H.J., Hilbers, C.W., and Heus, H.A. (2000) Structure of the ribozyme substrate hairpin of Neurospora VS RNA: A close look at the cleavage site. *RNA* 6, 1821-32.
- (5) Butcher, S.E., Allain, F.H.T., and Feigon, J. (1999) Solution structure of the loop B domain from the hairpin ribozyme. *Nat. Struct. Biol.* 6, 212-6.
- (6) Ravindranathan, S., Butcher, S.E., and Feigon, J. (2000) Adenine protonation in domain B of the hairpin ribozyme. *Biochemistry* 39, 16026-32.
- (7) Adams, P.L., Stahley, M.R., Kosek, A.B., Wang, J.M., and Strobel, S.A. (2004) Crystal structure of a self-splicing group I intron with both exons. *Nature* 430, 45-50.
- (8) Pan, B., Mitra, S.N., and Sundaralingam, M. (1998) Structure of a 16-mer RNA duplex r(GCAGACUUAAAUCUGC)<sub>2</sub> with wobble CA<sup>+</sup> mismatches. *J. Mol. Biol.* 283, 977-84.
- (9) Jang, S.B., Hung, L.W., Chi, Y.I., Holbrook, E.L., Carter, R.J., and Holbrook, S.R. (1998) Structure of an RNA internal loop consisting of tandem CA<sup>+</sup> base pairs. *Biochemistry* 37, 11726-31.
- (10) Lu, X.J., and Olson, W.K. (2003) 3DNA: a software package for the analysis, rebuilding and visualization of three-dimensional nucleic acid structures. *Nucleic Acids Res.* 31, 5108-21.
